# Supplementary material for: Improved identification and quantitation of mature endogenous peptides in the rodent hypothalamus using a rapid conductive sample heating system
Source: Royal Society of Chemistry journal article supplement (doi:10.1039/c7an01358b), 2017-01-01
Supplement: c7an01358b1.pdf [file c7an01358b1.pdf]

## **Improved identification and quantitation of mature endogenous peptides in the rodent hypothalamus using a rapid conductive sample heating system**

Ning Yang, Krishna D. B. Anapindi, Elena V. Romanova, Stanislav S. Rubakhin, Jonathan V. Sweedler\*

Department of Chemistry and the Beckman Institute for Advanced Science and Technology, University of Illinois at Urbana-Champaign, Urbana 61801, United States.

### **Supplementary Information**

#### **Table of contents**

- Fig. S1. MRM chromatograms of neuropeptide neuroVGF [488-507].
- Fig. S2. MRM chromatograms of truncated proSAAS[62-76]-derived peptide, proSAAS[62-75].

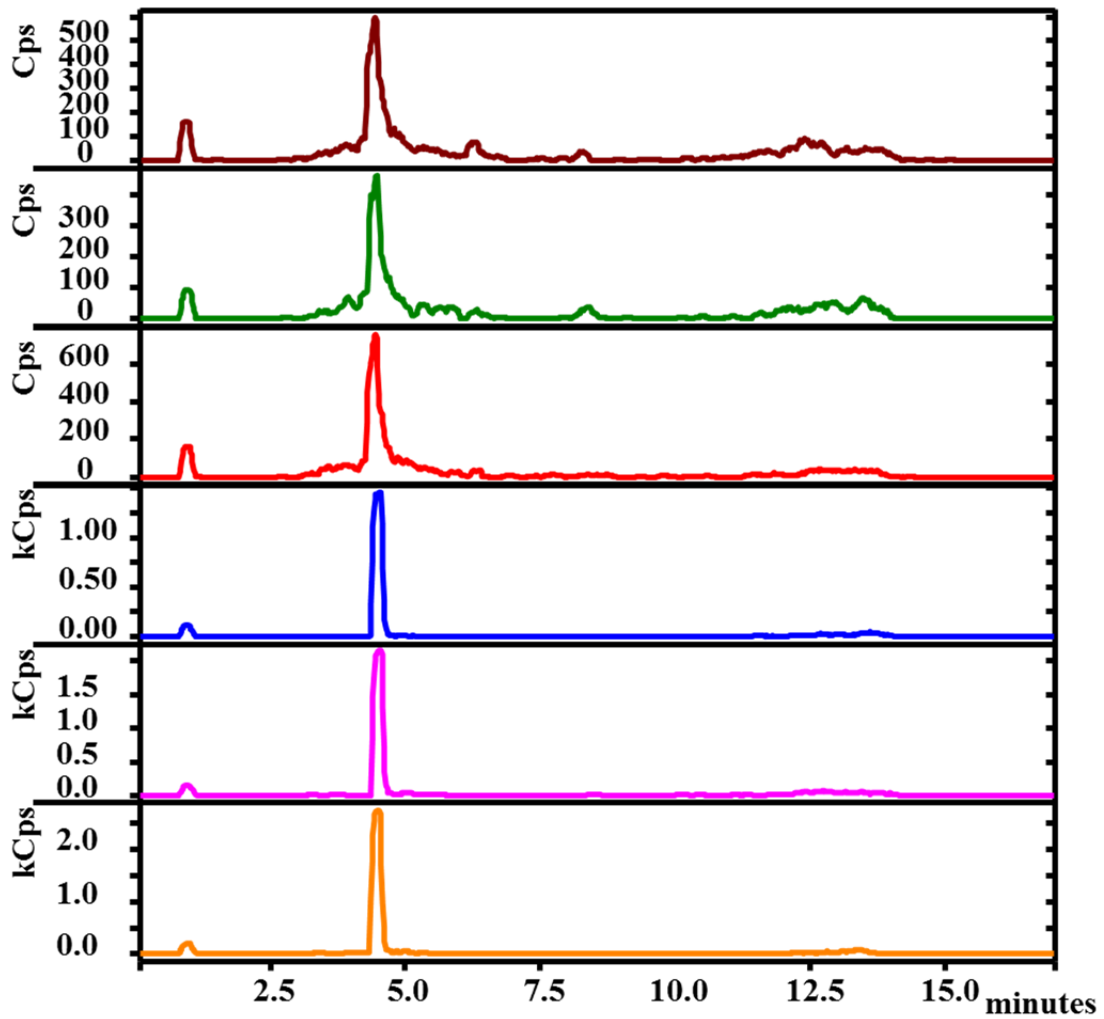

**Fig. S1.** MRM chromatograms of neuropeptide neuroVGF [488-507]. Higher background signals were observed in hot water-treated SCNs (top three panels) but not laser-treated SCNs (bottom three panels).

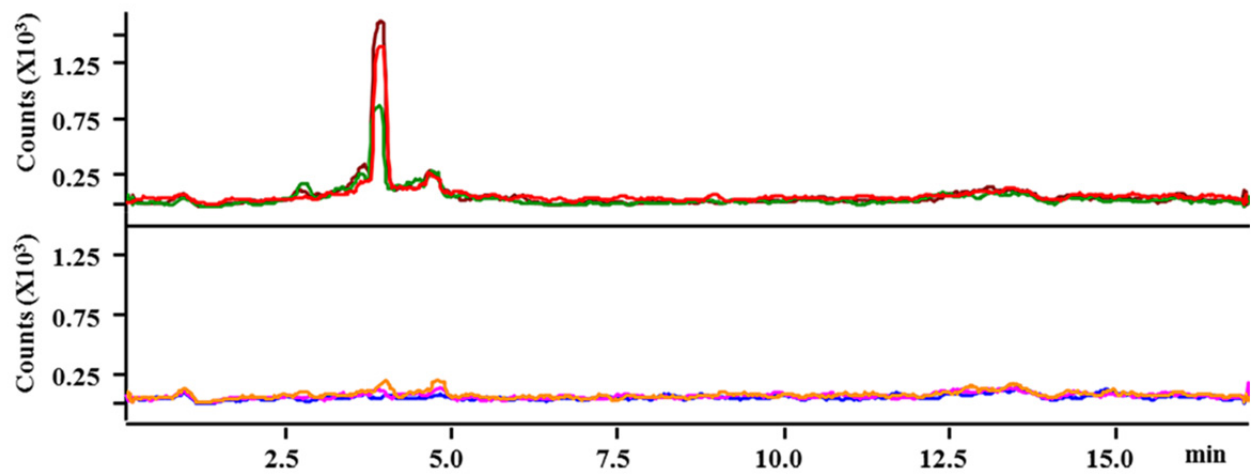

**Fig. S2.** MRM chromatograms of truncated proSAAS[62-76]-derived peptide, proSAAS[62-75]. Peaks of this C-terminal truncated peptide were only observed in hot water-treated SCNs (top panel) but not ST1-treated SCNs (bottom panel).
